# Supplementary material for: Regional Differences in Airway Epithelial Cells Reveal Tradeoff between Defense against Oxidative Stress and Defense against Rhinovirus
Source: PubMed Central journal article supplement — Cell Rep. Author manuscript; Available in PMC 2018 Oct 16. (PMC6190718; doi:10.1016/j.celrep.2018.08.033), 2018-09-11
Supplement: NIHMS1507856-supplement-1.pdf [file NIHMS1507856-supplement-1.pdf]

**Cell Reports, Volume 24**

**Supplemental Information**

**Regional Differences in Airway Epithelial Cells**

**Reveal Tradeoff between Defense against Oxidative**

**Stress and Defense against Rhinovirus**

**Valia T. Mihaylova, Yong Kong, Olga Fedorova, Lokesh Sharma, Charles S. Dela Cruz, Anna Marie Pyle, Akiko Iwasaki, and Ellen F. Foxman**

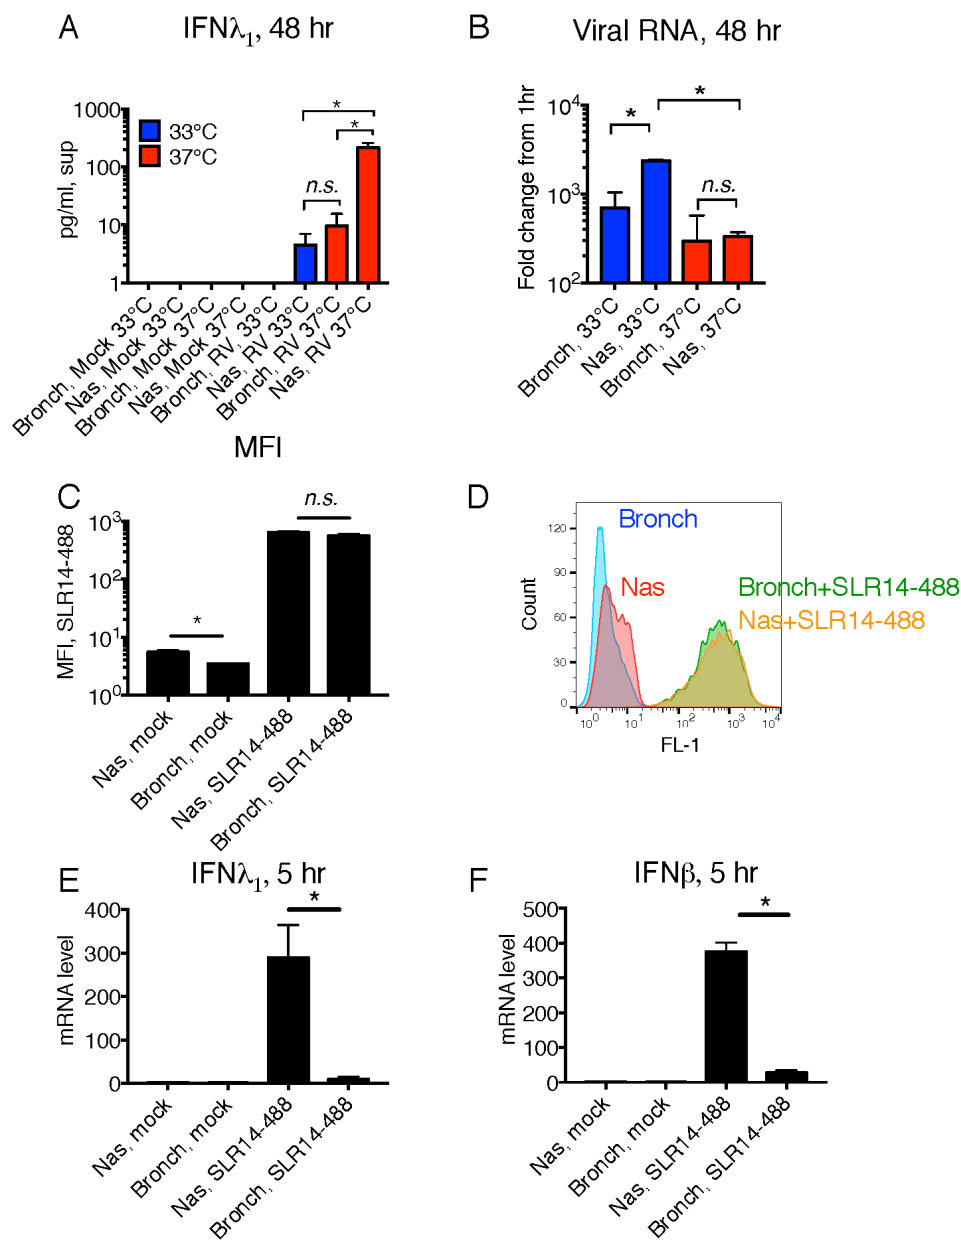

**Figure S1. Related to Fig 1. Response to RV1B infection or RIG-I stimulation in primary human bronchial and nasal-derived epithelial cells.** Primary human bronchial epithelial cells (bronch) and human nasal epithelial cells (nas) were mock-infected or infected with RV1B, MOI 0.1, then medium was added and cells were incubated for 48 hr at 33°C or 37°C. At this time, supernatants were collected for ELISA and cells were collected to assess viral RNA by RT-qPCR. **(A)** IFN $\lambda_1$  levels were above the detection limit for only three conditions, as shown. Level of IFN $\lambda_1$  for nasal cells at 37°C was significantly higher than level in bronchial cells incubated at 37°C or in nasal cells incubated at 33°C (\* $p < 0.02$ ). 37°C data only for this experiment is also shown in Figure 1A, however here IFN $\lambda_1$  level is shown on a LOG<sub>10</sub> scale to better demonstrate detection of low level of IFN $\lambda_1$  in two of the conditions. **(B)** Viral RNA level at 48 hr is graphed as fold change from level post-inoculation ( $t=1$ hr). \* $p < 0.01$  **(C-F)** Primary nasal or bronchial cells were transfected with SLR14-488 using lipofectamine as in Fig 1. Following transfection, cells were either collected within 1 hr for flow cytometry or incubated for 5 hr at 37°C, then cells were collected for RNA isolation and RT-qPCR to assess ISG induction. **(C)** Bars show mean fluorescence intensity in FL1 channel of untransfected cells (mock) or cells transfected with SLR14-488. Mean and S.D. of three replicates are shown. Autofluorescence of untreated nasal cells in FL1 channel was higher than that of bronchial cells (\* $p < 0.001$ ), but upon SLR14-488 transfection, fluorescence increased in all cells and cell types did not significantly differ in MFI. **(D)** Plot of representative samples from **(C)** showing distribution of cells in FL1 channel. **(E,F)** Level of IFN $\lambda_1$  and IFIT2 mRNA in nasal and bronchial cells 5 hr post transfection with SLR14-488, normalized to HPRT and expressed as fold change from mock-treated bronchial cells. Significant difference was seen in mRNA level of IFN $\lambda_1$  and IFIT2 in SLR14-488 transfected nasal and bronchial cells ( $p < 0.05$ .) Results are representative of at least three independent experiments with at least two different donors for each cell type. Bars show mean and S.D. of 2-3 replicates per condition.

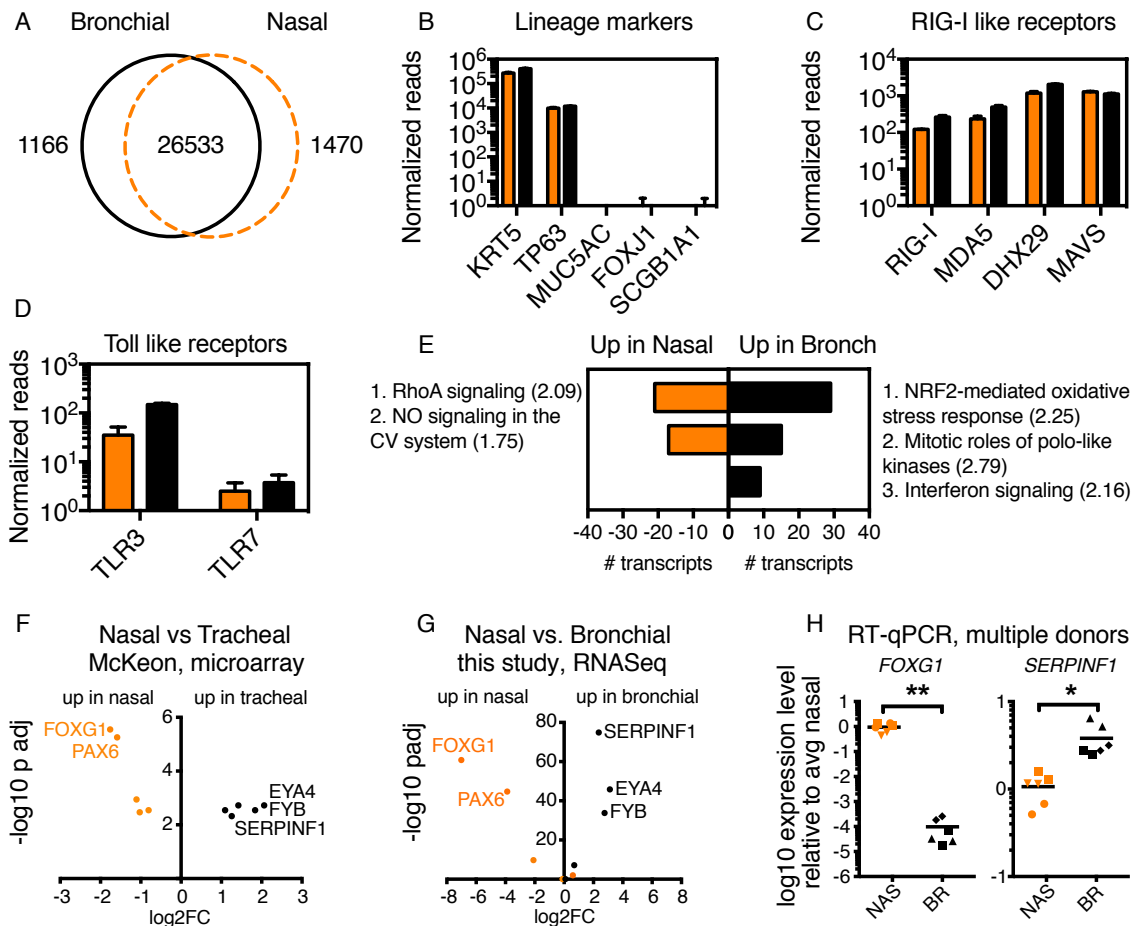

**Fig. S2. Related to Figure 2. Comparison of mRNA expression in resting bronchial and nasal primary airway epithelial cells (AECs).**

(A) Venn diagram showing number of transcripts in common and differentially enriched ( $\log_2FC > 1$  or  $\log_2FC < -1$ ,  $P_{adj} < 0.05$ ) in resting bronchial vs. nasal epithelial cells.

(B) Relative expression level of lineage markers of basal cells (KRT5, TP63), goblet cells (MUC5AC), ciliated cells (FOXJ1), and Club cells (SCGB1A1.)

(C) Relative expression of mRNAs encoding components of RLR signaling pathways in resting AECs.

(D) Relative expression of TLRs involved in viral RNA recognition in AECs.

(E) Ingenuity Pathway analysis of pathways enriched in each cell type at rest. Only significantly differentially enriched pathways ( $Z$  score  $> 1$ ,  $p < 0.01$ ) are shown. Bars indicate number of differentially expressed transcripts associated with each pathway. Numbers in parentheses represent  $-\text{LOG}_{10}$  p-value for relative enrichment of transcriptome for transcripts associated with the indicated Ingenuity pathway. Note that pathways associated with transcriptome changes following SLR14 treatment (Fig 2) are associated with much more significant p values.

(F) Volcano plot of microarray data from Kumar et al comparing nasal and tracheal airway progenitor cells, GSE32606. We compared all nasal sets to all tracheal data sets (2D and 3D growth conditions) and selected the 10 transcripts with highest differential expression by p-value.

(G) Volcano plot of RNAseq data from experiment shown in Fig 2, displaying top 10 transcripts differentially expressed in nasal vs. tracheal airway stem cells from Kumar et al identified in (F). Transcripts enriched in nasal vs. tracheal-derived cells in GSE32606 are indicated with orange dots.

(H) RT-qPCR data showing relative expression of FOXG1 and SERPINF1 mRNAs in cells from different donors used in this study. Plots show three donors per cell type with two replicates per donor (samples from different donors indicated by different symbols.) Expression level was calculated as  $\Delta\Delta C_t$  relative to  $\beta$ -actin mRNA level in each sample, and is graphed as fold change from the average expression level in nasal-derived cells. \* $p < 0.005$ , \*\* $p < 0.0001$

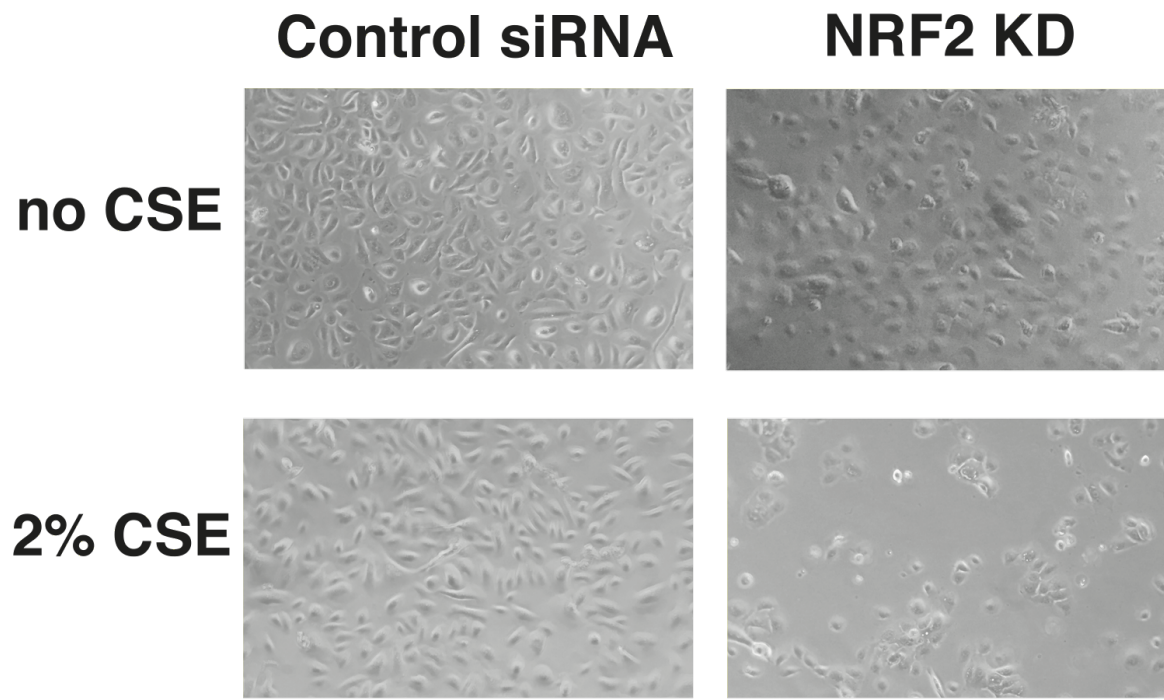

**Fig S3. Related to Figure 4. Micrographs showing nasal epithelial cells with or without NRF2 knockdown following exposure to CSE.** Nasal epithelial cells were treated with control RISC-free siRNA (left panels) or siRNA targeting NRF2 (right panels) and allowed to recover for 48 hr. Next, cells were incubated with medium only (top panels) or medium containing 2% CSE, followed by an additional 48 hr incubation. Cells treated with control siRNA maintained a healthy monolayer following exposure to 2% cigarette smoke extract (lower left panel) but NRF2 knockdown cells did not (lower right panel). Bar=100 $\mu$ m

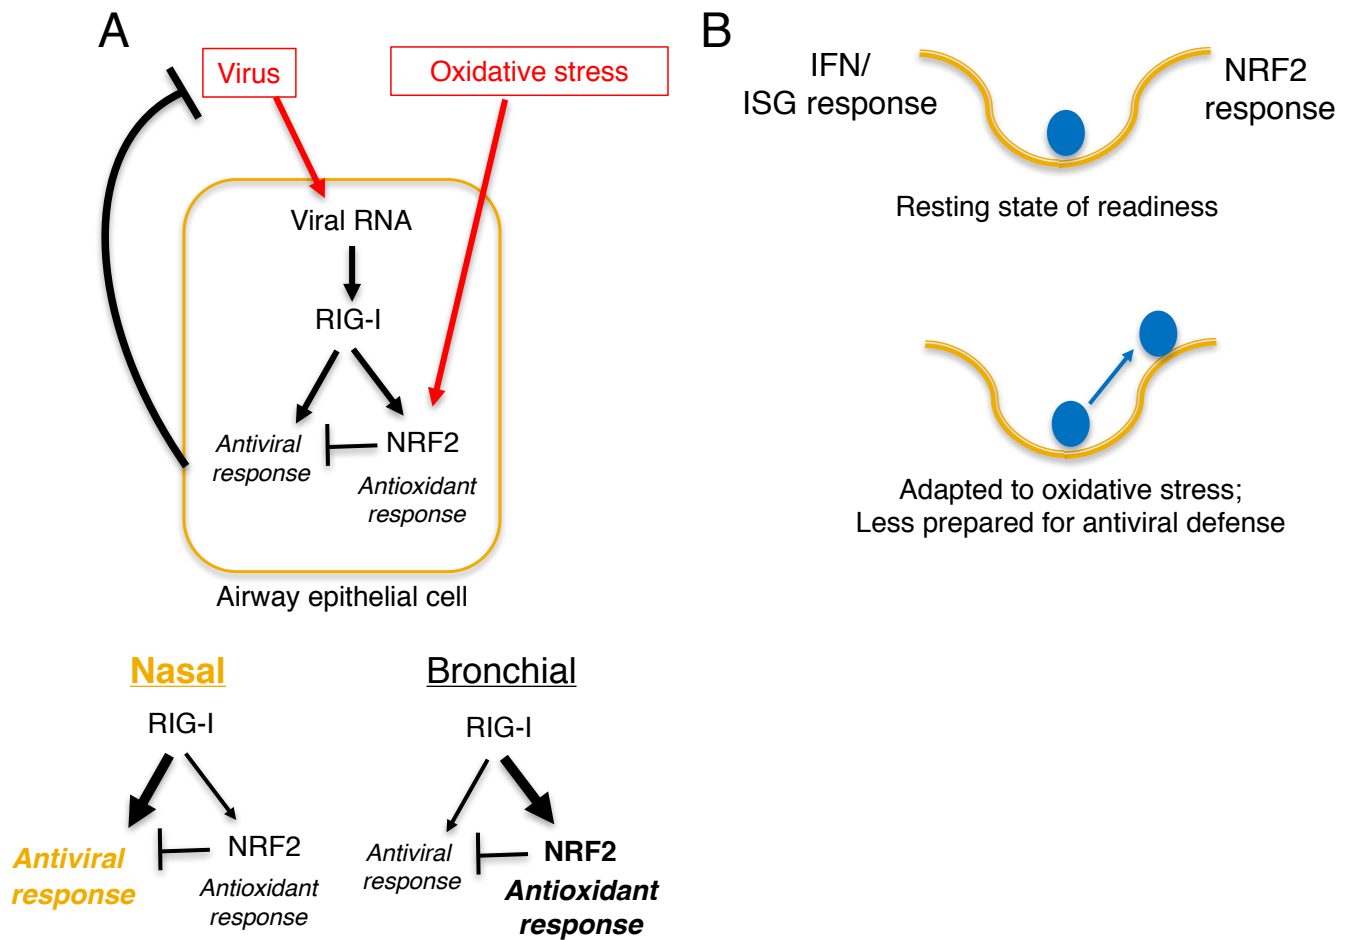

**Fig S4. Related to Figures 3 & 4. Model for fine-tuning of airway defense showing tradeoff between NRF2 response and antiviral response.** Our data supports a model in which viral infection triggers two host protective responses, cell-intrinsic antiviral responses and the NRF2 mediated defense response. **(A)** Drawing shows signaling within an airway epithelial cell, showing the balance between these defense responses. Cell intrinsic differences shift the balance away from NRF2 activity in favor of antiviral defense in nasal cells, whereas bronchial cells show a cell-intrinsic bias favoring antioxidant defense. This difference in set-point between nasal and bronchial-derived airway epithelial cells may reflect the need for adaptations to counter the attenuating effects of cooler temperature in the nasal passages on antiviral defense. Current or recent exposure to environmental sources of oxidative stress (i.e. cigarette smoke) would be expected to enhance NRF2 activity and antioxidant defense at the expense of antiviral responses. **(B)** Line represents adaptive landscape in which resting cells are equally able to adapt to oxidative stress (with NRF2 response) or viral infection (with IFN response), however adaptation to oxidative stress creates biological state less able to adapt to viral infection (right panel.)

**Table S1. Related to Figure 2. Ingenuity pathway analysis and pathway-associated transcripts, response to SLR14 in primary airway cells p<0.01, Z-score>1**

**Nasal**

| Ingenuity Canonical Pathways                                                 | -LOG p value | ratio        | Zscore | Molecules                                                                                                                          |
|------------------------------------------------------------------------------|--------------|--------------|--------|------------------------------------------------------------------------------------------------------------------------------------|
| Interferon Signaling                                                         | 13.3         | 4.17<br>E-01 | 3.207  | IFIT3,SOCS1,OAS1,MX1,IFI35,IRF9,IFITM2,TAP1,IRF1,ISG15,IFITM3,IFIT1,IFI6,STAT1,IFITM1                                              |
| Activation of IRF by Cytosolic Pattern Recognition Receptors                 | 8.38         | 2.26<br>E-01 | 2.138  | DHX58,ZBP1,IRF9,IL6,NFKB2,ISG15,IFIH1,IRF7,NFKBIA,JUN,DDX58,IFIT2,STAT1,TNF                                                        |
| Toll-like Receptor Signaling                                                 | 7.33         | 1.89<br>E-01 | 2.714  | TLR2,IL36G,JUN,NFKBIA,TICAM1,IL36RN,TNFAIP3,MAP2K3,EIF2AK2,IRAK3,NFKB2,UBC,TNF,IRAK2                                               |
| Role of Pattern Recognition Receptors in Recognition of Bacteria and Viruses | 7.3          | 1.44<br>E-01 | 3.317  | PTX3,CXCL8,OAS1,LIF,PRKCQ,OAS2,IL6,NFKB2,OAS3,TLR2,IFIH1,NOD2,IRF7,TICAM1,DDX58,TGFB2,EIF2AK2,TNF                                  |
| NRF2-mediated Oxidative Stress Response                                      | 6.78         | 1.17<br>E-01 | 2.887  | PRKCQ,DNAJB4,NQO1,HSPB8,DNAJA4,HERPUD1,DNAJC3,GCLC,DNAJA1,DNAJB9,MAFF,TXNRD1,HMOX1,JUN,STIP1,MAP2K3,FOSL1,DNAJB1,GCLM,EIF2AK3,ENC1 |
| p38 MAPK Signaling                                                           | 6.24         | 1.37<br>E-01 | 1.807  | TP53,PLA2G3,IRAK3,MKNK2,CREB5,CDC25B,PLA2G4E,PLA2G4A,IL36G,DUSP1,IL36RN,TGFB2,MAP2K3,STAT1,TNF,IRAK2                               |
| Hypoxia Signaling in the Cardiovascular System                               | 5.39         | 1.69<br>E-01 | 2.236  | TP53,HSP90B1,JUN,NFKBIA,EDN1,HSP90AB1,NQO1,HSP90AA1,CREB5,UBE2L6,UBE2D3                                                            |
| MIF Regulation of Innate Immunity                                            | 4.54         | 1.95<br>E-01 | 2.828  | TP53,PLA2G4E,PLA2G4A,JUN,NFKBIA,PLA2G3,PTGS2,NFKB2                                                                                 |
| iNOS Signaling                                                               | 4.3          | 1.82<br>E-01 | 2.449  | CAMK4,JUN,NFKBIA,NFKB2,IRAK3,STAT1,IRF1,IRAK2                                                                                      |
| TREM1 Signaling                                                              | 4.03         | 1.33<br>E-01 | 3.162  | TLR2,CXCL8,NLRC5,CXCL3,NOD2,ICAM1,NLRP10,NFKB2,IL6,TNF                                                                             |
| Death Receptor Signaling                                                     | 3.94         | 1.2E-01      | 1.508  | NFKBIA,PARP10,ZC3HAV1,TNFSF10,PARP12,NFKB2,CFLAR,BIRC3,TNF,PARP9,PARP14                                                            |
| Role of IL-17F in Allergic Inflammatory Airway Diseases                      | 3.46         | 1.59<br>E-01 | 2.449  | CXCL10,CXCL8,MMP13,CXCL1,NFKB2,IL6,CREB5                                                                                           |
| MIF-mediated Glucocorticoid Regulation                                       | 3.35         | 1.82<br>E-01 | 2.236  | PLA2G4E,PLA2G4A,NFKBIA,PLA2G3,PTGS2,NFKB2                                                                                          |
| Retinoic acid Mediated Apoptosis Signaling                                   | 3.28         | 1.31<br>E-01 | 2.121  | PARP10,ZC3HAV1,TNFSF10,PARP12,CFLAR,PARP9,IRF1,PARP14                                                                              |
| Eicosanoid Signaling                                                         | 3.14         | 1.25<br>E-01 | 2.449  | PLA2G4E,PLA2G4A,ABHD3,PLA2G3,RARRES3,PNPLA3,PTGS2,PTGER4                                                                           |
| IL-6 Signaling                                                               | 3.06         | 9.48<br>E-02 | 2.111  | CXCL8,SOCS1,SOCS3,IL36G,JUN,NFKBIA,IL36RN,MAP2K3,NFKB2,IL6,TNF                                                                     |
| Mitotic Roles of Polo-Like Kinase                                            | 3.05         | 1.21<br>E-01 | 1.342  | CDC25B,HSP90B1,ESPL1,CDC20,HSP90AB1,HSP90AA1,CDC25A,CCNB1                                                                          |

|                                                          |      |              |        |                                                                                                 |
|----------------------------------------------------------|------|--------------|--------|-------------------------------------------------------------------------------------------------|
| Dendritic Cell Maturation                                | 2.94 | 7.91<br>E-02 | 3.051  | TLR2,B2M,IL36G,NFKBIA,ICAM1,DDR2,RELB,IL36RN,IL6,NFKB2,STAT1,CREB5,TNF,FCGR1B                   |
| PI3K/AKT Signaling                                       | 2.85 | 8.94<br>E-02 | 2.333  | TP53,HSP90B1,NFKBIA,HSP90AB1,GDF15,ITGA2,HSP90AA1,PTGS2,NFKB2,SFN,INPP5D                        |
| PI3K Signaling in B Lymphocytes                          | 2.74 | 8.66<br>E-02 | 2.530  | CAMK4,JUN,ATF3,NFKBIA,DAPP1,LYN,NFATC2,NFATC4,PLEKHA4,NFKB2,INPP5D                              |
| Role of RIG1-like Receptors in Antiviral Innate Immunity | 2.73 | 1.4E-01      | 1.342  | DHX58,IFIH1,IRF7,NFKBIA,DDX58,NFKB2                                                             |
| Acute Phase Response Signaling                           | 2.66 | 7.69<br>E-02 | 2.111  | HMOX1,SOCS3,SOCS1,IL36G,JUN,NFKBIA,IL36RN,CFB,VWF,MAP2K3,IL6,NFKB2,TNF                          |
| Endothelin-1 Signaling                                   | 2.6  | 7.56<br>E-02 | 2.496  | PLA2G4E,HMOX1,PLA2G4A,JUN,PRKCQ,EDN1,ABHD3,MAPK15,SHC2,PLA2G3,RARRES3,PNPLA3,PTGS2              |
| NF-κB Signaling                                          | 2.6  | 7.56<br>E-02 | 1.941  | TLR2,IL36G,NFKBIA,PRKCQ,BMP2,RELB,IL36RN,PELI1,TNFAIP3,EIF2AK2,IRAK3,NFKB2,TNF                  |
| B Cell Receptor Signaling                                | 2.55 | 7.47<br>E-02 | 3.051  | CAMK4,JUN,PRKCQ,NFKBIA,DAPP1,PAG1,LYN,NFATC2,MAP2K3,NFATC4,NFKB2,CREB5,INPP5D                   |
| TNFR1 Signaling                                          | 2.43 | 1.22<br>E-01 | 1.342  | JUN,NFKBIA,TNFAIP3,NFKB2,BIRC3,TNF                                                              |
| HMGB1 Signaling                                          | 2.41 | 8.33<br>E-02 | 2.530  | CXCL8,ICAM1,JUN,LIF,TGFB2,MAP2K3,NFKB2,IL6,TNF,PLAT                                             |
| UVA-Induced MAPK Signaling                               | 2.25 | 9.09<br>E-02 | 1.890  | TP53,JUN,PARP10,ZC3HAV1,PARP12,STAT1,PARP9,PARP14                                               |
| Colorectal Cancer Metastasis Signaling                   | 2.2  | 6.36<br>E-02 | 3.742  | TP53,MMP13,VEGFC,NFKB2,IL6,TLR2,FZD4,JUN,TGFB2,PTGS2,GNB1L,STAT1,TNF,MP1,PTGER4                 |
| Gas Signaling                                            | 2.2  | 8.26<br>E-02 | 2.121  | HCAR3,RGS2,RAPGEF2,RAPGEF3,GNB1L,CREB5,HCAR2,PTGER4,ADRB2                                       |
| Phospholipase C Signaling                                | 2.18 | 6.33<br>E-02 | 2.887  | CAMK4,PRKCQ,ITGA2,PLA2G3,RAPGEF3,NFATC4,NFKB2,CREB5,TGM2,PLA2G4E,HMOX1,PLA2G4A,LYN,NFATC2,GNB1L |
| Type I Diabetes Mellitus Signaling                       | 2.17 | 8.18<br>E-02 | 1.414  | SOCS1,SOCS3,NFKBIA,MAP2K3,NFKB2,HLA-F,STAT1,TNF,IRF1                                            |
| Antioxidant Action of Vitamin C                          | 4.99 | 1.31<br>E-01 | -3.162 | PLA2G4E,HMOX1,PLA2G4A,NFKBIA,ABHD3,PLA2G3,RARRES3,PNPLA3,NFKB2,SLC23A3,GLRX,TNF,TXNRD1          |
| PPAR Signaling                                           | 4.57 | 1.29<br>E-01 | -3.464 | HSP90B1,IL36G,JUN,NFKBIA,HSP90AB1,PPARD,IL36RN,HSP90AA1,PTGS2,NFKB2,TNF,PPARGC1A                |
| LXR/RXR Activation                                       | 3.46 | 9.92<br>E-02 | -1.414 | APOL1,FDFT1,IL36G,LDLR,FASN,IL36RN,PTGS2,NFKB2,IL6,HMGCR,TNF,CYP51A1                            |
| PPARα/RXRα Activation                                    | 2.05 | 6.74<br>E-02 | -1.265 | HSP90B1,JUN,NFKBIA,HSP90AB1,HELZ2,FASN,TGFB2,HSP90AA1,MAP2K3,NFKB2,IL6,PPARGC1A                 |

## Bronchial

| Ingenuity Canonical Pathways                                                    | -log(p-value) | Ratio        | z-score | Molecules                                                                                                                    |
|---------------------------------------------------------------------------------|---------------|--------------|---------|------------------------------------------------------------------------------------------------------------------------------|
| NRF2-mediated Oxidative Stress Response                                         | 11.8          | 1.06<br>E-01 | 2.333   | DNAJB4,NQO1,DNAJA4,HSPB8,HERPUD1,DNAJC3,GCLC,DNAJA1,DNAJB9,TXNRD1,M<br>AFG,HMOX1,FOS,DNAJB11,SQSTM1,DNAJB1,GCLM,EIF2AK3,ENC1 |
| Interferon Signaling                                                            | 6.53          | 1.94<br>E-01 | 1.890   | IFIT3,SOCS1,IFIT1,OAS1,MX1,IRF1,ISG15                                                                                        |
| Role of Pattern Recognition Receptors in<br>Recognition of Bacteria and Viruses | 5.36          | 8E-<br>02    | 1.633   | IFIH1,CXCL8,OAS1,IRF7,NOD2,OAS2,DDX58,IL1B,IL6,OAS3                                                                          |
| Activation of IRF by Cytosolic Pattern<br>Recognition Receptors                 | 3.88          | 9.68<br>E-02 | 1.633   | IFIH1,IRF7,DDX58,IL6,IFIT2,ISG15                                                                                             |
| eNOS Signaling                                                                  | 3.34          | 5.63<br>E-02 | -2.000  | HSPA8,HSP90B1,AQP5,CCNA1,HSPA1A/HSPA1B,HSPA6,HSP90AA1,HSPA5                                                                  |
| PPAR Signaling                                                                  | 3.75          | 7.53<br>E-02 | -1.134  | IL33,FOS,HSP90B1,IL36G,HSP90AA1,IL1B,PTGS2                                                                                   |
| Antioxidant Action of Vitamin C                                                 | 2.79          | 6.06<br>E-02 | -1.000  | HMOX1,ABHD3,PLA2G3,PLCH2,GLRX,TXNRD1                                                                                         |



**Table S2. Related to key resources table. qPCR primers used in this study**

| REAGENT or RESOURCE                  | SOURCE                            | IDENTIFIER |
|--------------------------------------|-----------------------------------|------------|
| <b>Oligonucleotides</b>              |                                   |            |
| b-actin, F:CCTGGCACCCAGCACAAT        | Keck DNA synthesis facility, Yale | n/a        |
| b-actin, R:GCCGATCCACACGGAGTACT      | Keck DNA synthesis facility, Yale | n/a        |
| IFN lambda 1, F:GACTTTGGTGCTAGGCTTGG | Keck DNA synthesis facility, Yale | n/a        |
| IFN lambda 1, R:AGATTGAACTGCCAATGTG  | Keck DNA synthesis facility, Yale | n/a        |
| IFN beta, F: CTTTCGAAGCCTTTGCTCTG    | Keck DNA synthesis facility, Yale | n/a        |
| IFN beta, R: GGAGAGCAATTTGGAGGAGAC   | Keck DNA synthesis facility, Yale | n/a        |
| OAS1, F:GCTCCTACCCTGTGTGTGTGT        | Keck DNA synthesis facility, Yale | n/a        |
| OAS1, R: : TGGTGAGAGGACTGAGGAAGA     | Keck DNA synthesis facility, Yale | n/a        |
| IFIT2, F: CCTCAAAGGGCAAACGAGG        | Keck DNA synthesis facility, Yale | n/a        |
| IFIT2, R: CTGATTTCTGCCTGGTCAGC       | Keck DNA synthesis facility, Yale | n/a        |
| NRF2, F: TTCTGACTCCGGCATTTCAC        | Keck DNA synthesis facility, Yale | n/a        |
| NRF2, R: AGGCCAAGTAGTGTGTCTCC        | Keck DNA synthesis facility, Yale | n/a        |
| NQO1, F: GGACGTCCTTCAACTATGCC        | Keck DNA synthesis facility, Yale | n/a        |
| NQO1, R: TCATGGCATAGAGGTCCGAC        | Keck DNA synthesis facility, Yale | n/a        |
| GCLC, F: CAAACCCAAACCATCCTACCC       | Keck DNA synthesis facility, Yale | n/a        |
| GCLC, R: ACTCGGACATTGTTCCCTCCG       | Keck DNA synthesis facility, Yale | n/a        |
| MAVS, F: GCAGCTCTGAGAATAGGGGC        | Keck DNA synthesis facility, Yale | n/a        |
| MAVS, R: TGGCAAGATCCTCGAAGCAG        | Keck DNA synthesis facility, Yale | n/a        |
| FOXG1, F: GCCAGCAGCACTTTGAGTTAC      | Keck DNA synthesis facility, Yale | n/a        |
| FOXG1, R: CCCAGCGAGTTCTGAGTCAA       | Keck DNA synthesis facility, Yale | n/a        |
| SERPINF1, F: TTACGCTATGGCTTGGATTC    | Keck DNA synthesis facility, Yale | n/a        |
| SERPINF1, R: AAATTCTGGGTCACCTTCAGG   | Keck DNA synthesis facility, Yale | n/a        |
| RV1B, 5'UTR, F: ACGGACACCCAAAGTAGTCG | Keck DNA synthesis facility, Yale | n/a        |
| RV1B, 5'UTR, R: ATCTTTGGTTGGTCGCTCAG | Keck DNA synthesis facility, Yale | n/a        |
